# Supplementary material for: Large, Rapid Swelling of High-cis Polydicyclopentadiene Aerogels Suitable for Solvent-Responsive Actuators
Source: MDPI journal article supplement (doi:10.3390/polym12051033), 2020-05-02
Supplement: s1 [file s1]

# Large, rapid swelling of high-*cis* polydicyclopentadiene aerogels suitable for solvent-responsive actuators

Despoina Chriti,<sup>1</sup> Grigorios Raptopoulos,<sup>1</sup> Benjamin Brandenburg,<sup>2</sup> Patrina Paraskevopoulou<sup>1,\*</sup>

<sup>1</sup> *Laboratory of Inorganic Chemistry, Department of Chemistry, National and Kapodistrian University of Athens, Panepistimiopolis Zografou, Athens 15771, Greece.*

<sup>2</sup> *Dräger Safety AG & Co. KGaA, Revalstraße 1, 23560 Lübeck, Germany.*

\* Correspondance : [paraskevopoulou@chem.uoa.gr](mailto:paraskevopoulou@chem.uoa.gr) (P.P.); Tel.: +30-210-727-4381; Fax: +30-210-727-4782

## Table of Contents

|                                                                                                                                                                                                                                                                                                                                                                                                                                                                     | Page |
|---------------------------------------------------------------------------------------------------------------------------------------------------------------------------------------------------------------------------------------------------------------------------------------------------------------------------------------------------------------------------------------------------------------------------------------------------------------------|------|
| <b>Table of Contents</b>                                                                                                                                                                                                                                                                                                                                                                                                                                            | S-2  |
| <b>Table S1.</b> Formulations used for the synthesis of <b>PDCPD</b> xerogels and aerogels using the catalytic system <b>W<sub>2</sub>/NBD</b> .                                                                                                                                                                                                                                                                                                                    | S-3  |
| <b>Figure S1.</b> Top row: ATR-FTIR spectra (left: 1700-1590 cm <sup>-1</sup> ; right: 1500-675 cm <sup>-1</sup> ) of <b>PDCPD</b> aerogels and xerogels obtained from ROMP of <b>DCPD</b> with three catalytic systems, as indicated. Bottom row: FT-Raman spectra (left: 3200-1200 cm <sup>-1</sup> ; right: 1710-1590 cm <sup>-1</sup> ) of <b>PDCPD</b> aerogels and xerogels obtained from the ROMP of <b>DCPD</b> with three catalytic systems, as indicated. | S-3  |
| <b>Figure S2.</b> <sup>13</sup> C CPMAS NMR spectra of <b>PDCPD</b> aerogels obtained from ROMP of <b>DCPD</b> with three catalytic systems, as indicated.                                                                                                                                                                                                                                                                                                          | S-4  |
| <b>Figure S3.</b> Weight loss with temperature (left) and derivative weight loss with temperature (right) of <b>PDCPD</b> aerogels and xerogels obtained from the ROMP of <b>DCPD</b> with three catalytic systems, as indicated.                                                                                                                                                                                                                                   | S-4  |
| <b>Figure S4.</b> Swelling of a <b>PDCPD</b> aerogel thin disk in toluene <i>versus</i> time.                                                                                                                                                                                                                                                                                                                                                                       | S-5  |
| <b>Figure S5.</b> Swelling of a <b>PDCPD</b> aerogel thin disk in dichloromethane <i>versus</i> time.                                                                                                                                                                                                                                                                                                                                                               | S-5  |
| <b>Figure S6.</b> Swelling of a <b>PDCPD</b> aerogel thin disk in chloroform <i>versus</i> time.                                                                                                                                                                                                                                                                                                                                                                    | S-6  |
| <b>Figure S7.</b> Swelling of a <b>PDCPD</b> aerogel thin disk in chlorobenzene <i>versus</i> time.                                                                                                                                                                                                                                                                                                                                                                 | S-6  |
| <b>Figure S8.</b> Swelling of a <b>PDCPD</b> aerogel thin disk in bromobenzene <i>versus</i> time.                                                                                                                                                                                                                                                                                                                                                                  | S-7  |
| <b>Figure S9.</b> Swelling of a <b>PDCPD</b> aerogel thin disk in THF <i>versus</i> time.                                                                                                                                                                                                                                                                                                                                                                           | S-7  |
| <b>Figure S10.</b> Swelling of a <b>PDCPD</b> aerogel thin disk in 1-bromobutane <i>versus</i> time.                                                                                                                                                                                                                                                                                                                                                                | S-8  |
| <b>Figure S11.</b> Swelling of a <b>PDCPD</b> aerogel thin disk in ethyl bromide <i>versus</i> time.                                                                                                                                                                                                                                                                                                                                                                | S-8  |
| <b>Figure S12.</b> Swelling of a <b>PDCPD</b> aerogel thin disk in ethylene dichloride <i>versus</i> time.                                                                                                                                                                                                                                                                                                                                                          | S-9  |
| <b>Figure S13.</b> Swelling of a <b>PDCPD</b> aerogel thin disk in <i>m</i> -xylene <i>versus</i> time.                                                                                                                                                                                                                                                                                                                                                             | S-9  |
| <b>Figure S14.</b> Swelling of a <b>PDCPD</b> aerogel thin disk in <i>p</i> -xylene <i>versus</i> time.                                                                                                                                                                                                                                                                                                                                                             | S-10 |
| <b>Figure S15.</b> Swelling of a <b>PDCPD</b> aerogel thin disk in mesitylene <i>versus</i> time.                                                                                                                                                                                                                                                                                                                                                                   | S-10 |

**Table S2.** Formulations used for the synthesis of **PDCPD** xerogels and aerogels using the catalytic system **W<sub>2</sub>/NBD**.<sup>a</sup>

| <b>W<sub>2</sub>/NBD/DCPD</b><br>(molar ratio) | <b>Catalyst</b><br>(mg, mmol) | <b>NBD</b><br>( $\mu$ L, mmol) | <b>DCPD<sup>b</sup></b><br>(mL, mmol) | <b>Gelation time</b><br>(min) |
|------------------------------------------------|-------------------------------|--------------------------------|---------------------------------------|-------------------------------|
| 1/5/350                                        |                               | 10.2, 0.1                      |                                       | – <sup>c</sup>                |
| 1/10/350                                       |                               | 20.4, 0.2                      |                                       | 15                            |
| 1/20/350                                       | 21.50, 0.02                   | 40.8, 0.4                      | 1.00, 7.0                             | 10                            |
| 1/30/350                                       |                               | 61.2, 0.6                      |                                       | 5                             |
| 1/40/350                                       |                               | 81.6, 0.8                      |                                       | 3                             |

<sup>a</sup> Solvent: methylene dichloride (12 mL). <sup>b</sup> [DCPD] = 20% w/w. <sup>c</sup> No gelation was observed within 72 h.

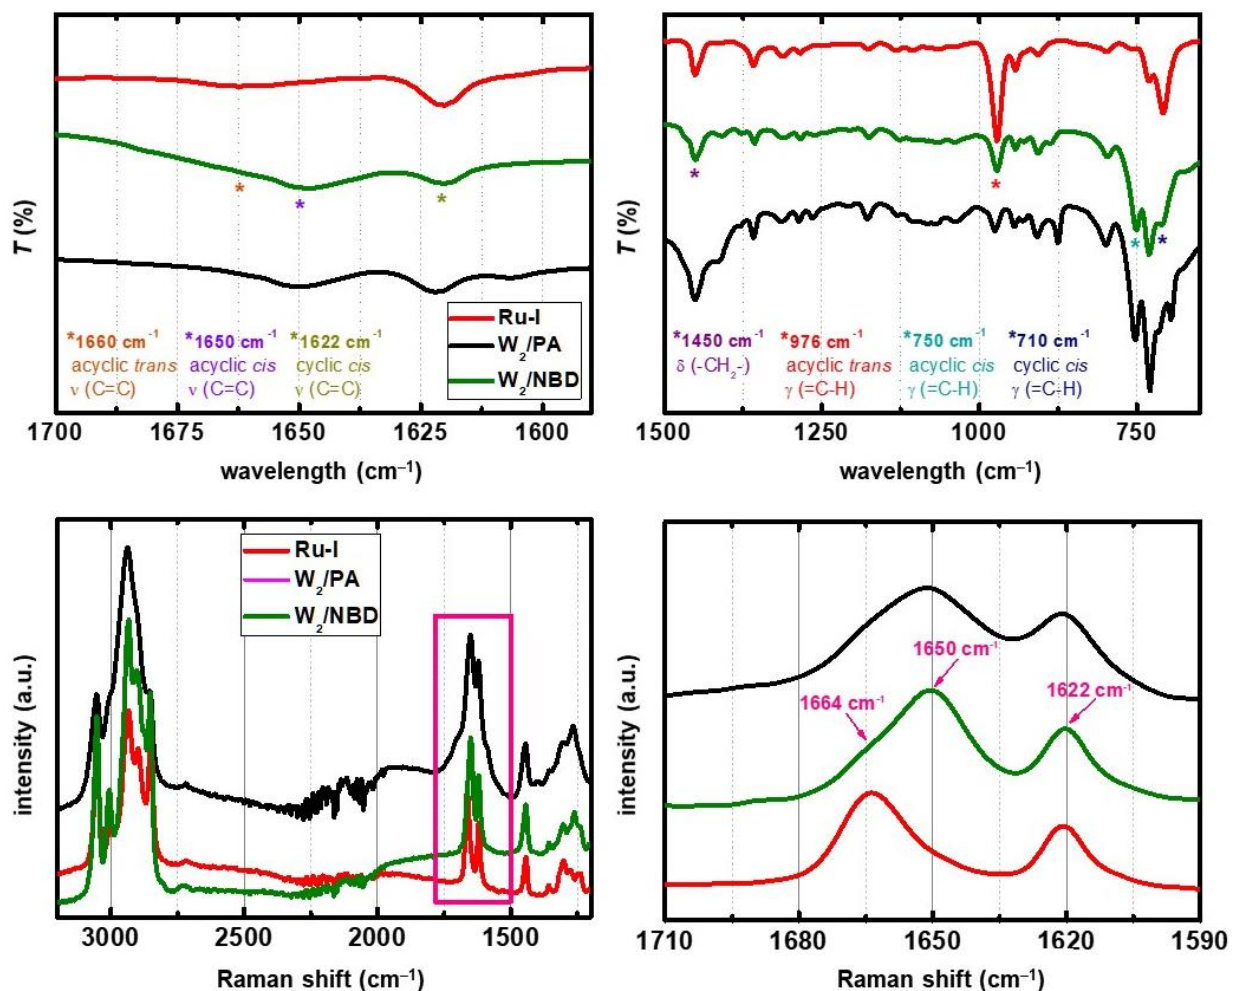

**Figure S1.** Top row: ATR-FTIR spectra (left: 1700-1590  $\text{cm}^{-1}$ ; right: 1500-675  $\text{cm}^{-1}$ ) of **PDCPD** aerogels and xerogels obtained from ROMP of **DCPD** with three catalytic systems, as indicated. Bottom row: FT-Raman spectra (left: 3200-1200  $\text{cm}^{-1}$ ; right: 1710-1590  $\text{cm}^{-1}$ ) of **PDCPD** aerogels and xerogels obtained from the ROMP of **DCPD** with three catalytic systems, as indicated.

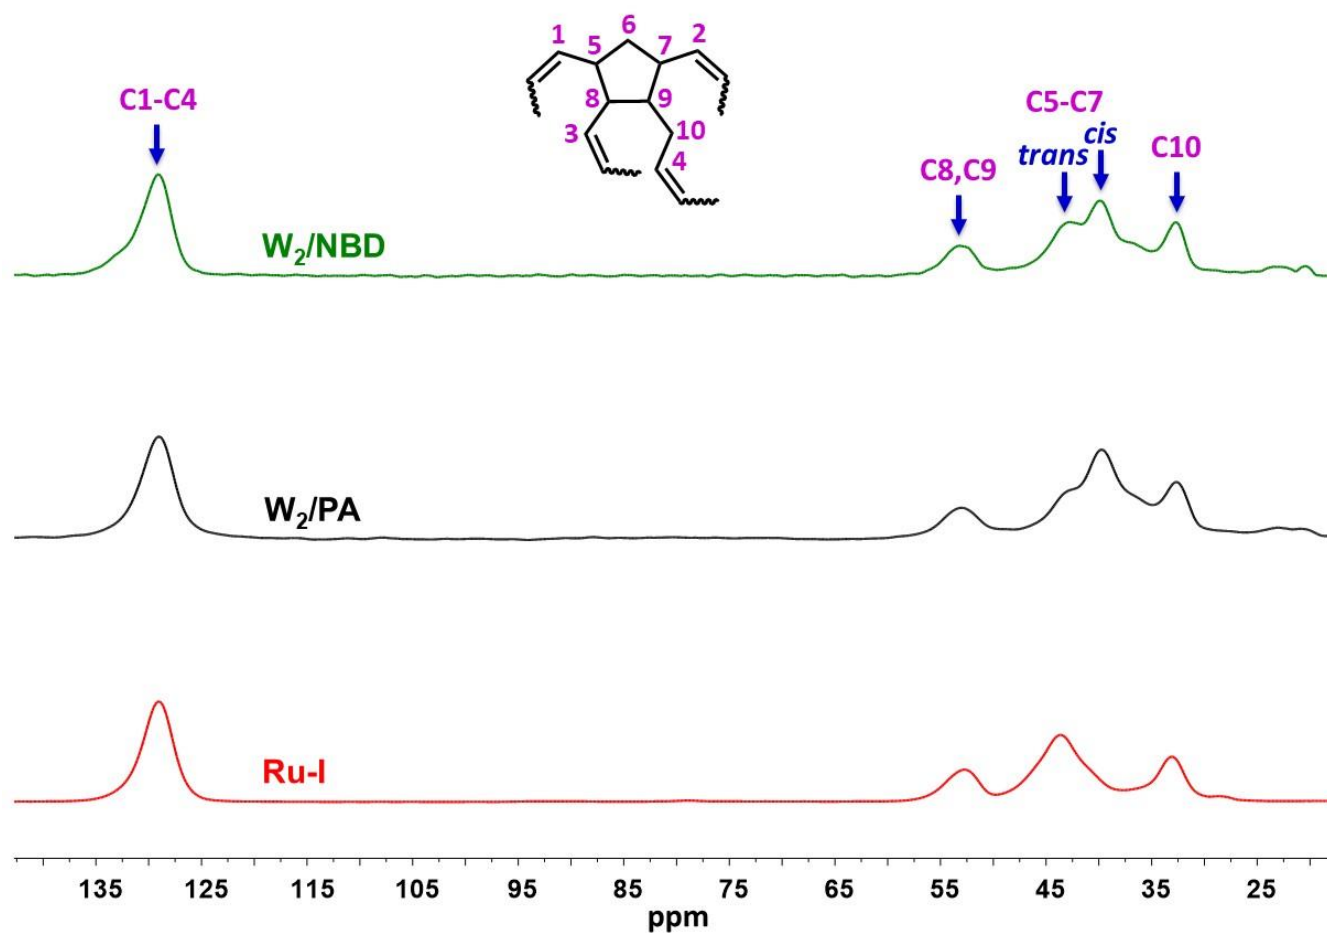

**Figure S2.**  $^{13}\text{C}$  CPMAS NMR spectra of PDCPD aerogels obtained from ROMP of DCPD with three catalytic systems, as indicated.

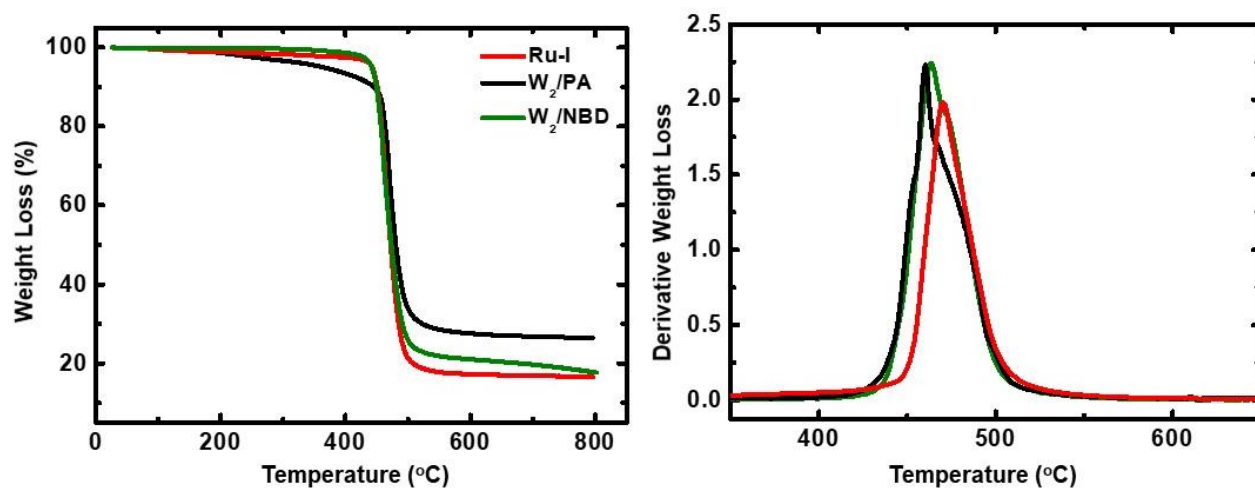

**Figure S3.** Weight loss with temperature (left) and derivative weight loss with temperature (right) of PDCPD aerogels and xerogels obtained from the ROMP of DCPD with three catalytic systems, as indicated.

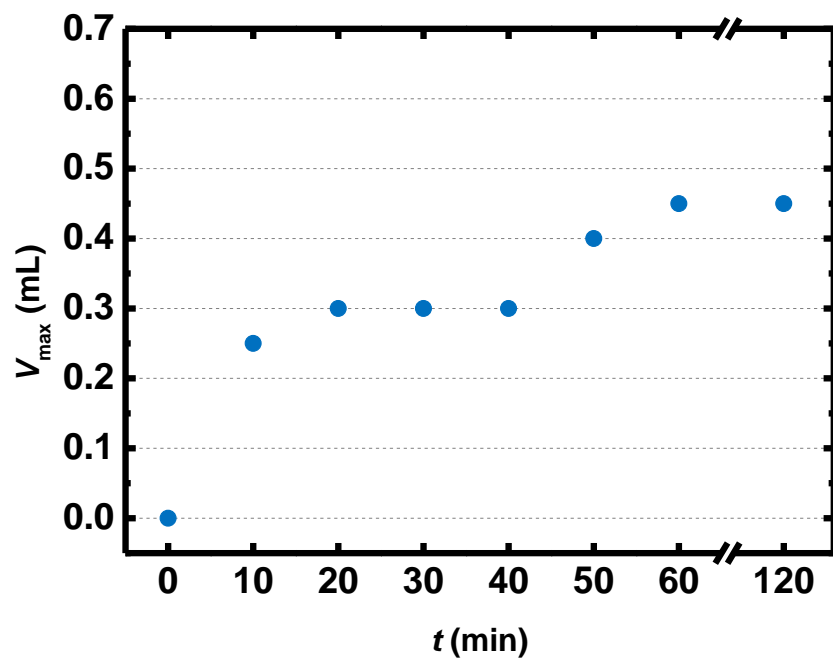

Figure S4. Swelling of a PDCPD aerogel thin disk in toluene *versus* time.

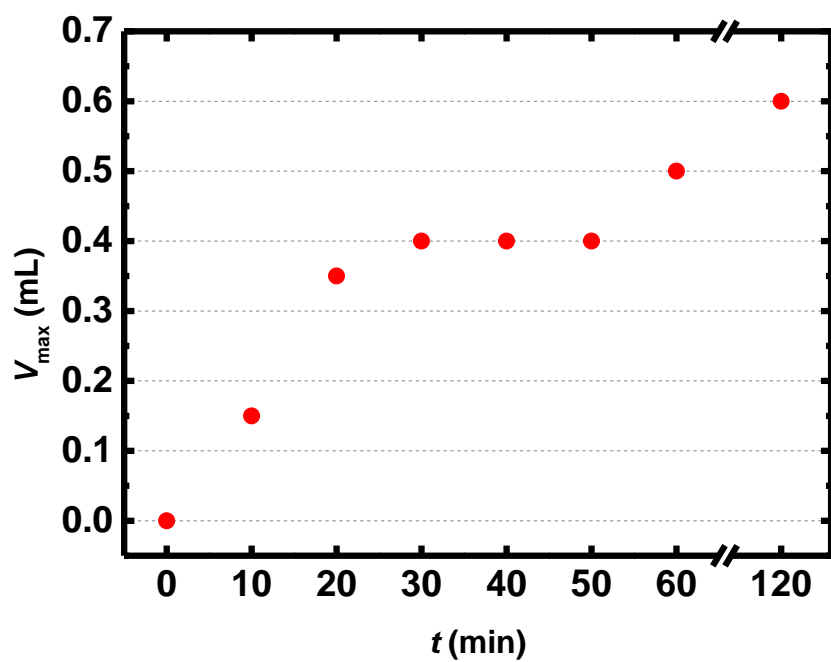

Figure S5. Swelling of a PDCPD aerogel thin disk in dichloromethane *versus* time.

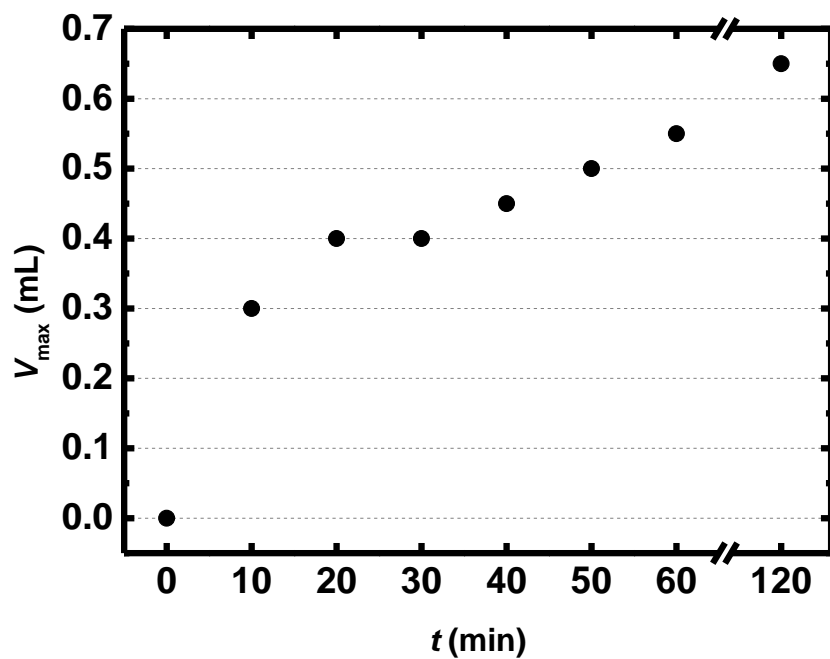

Figure S6. Swelling of a PDCPD aerogel thin disk in chloroform *versus* time.

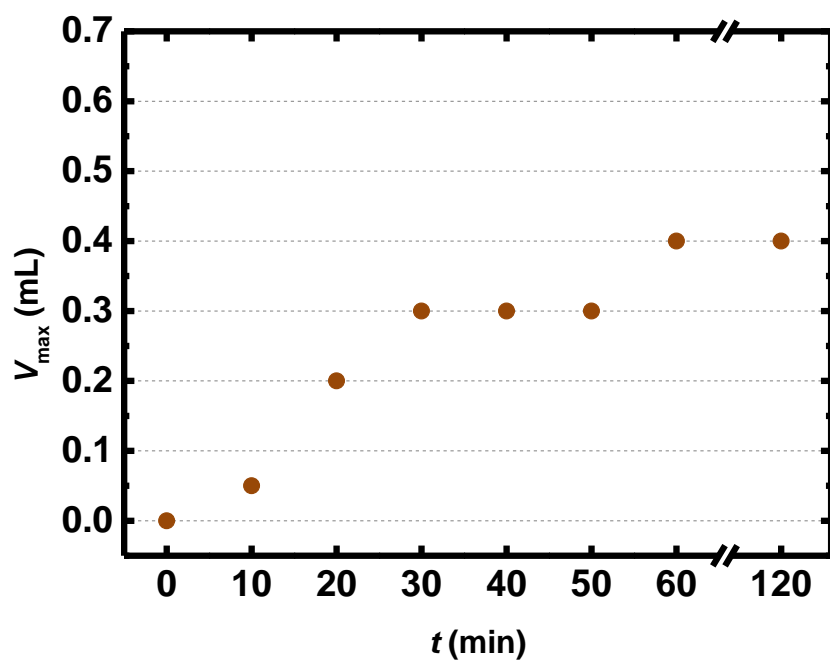

Figure S7. Swelling of a PDCPD aerogel thin disk in chlorobenzene *versus* time.

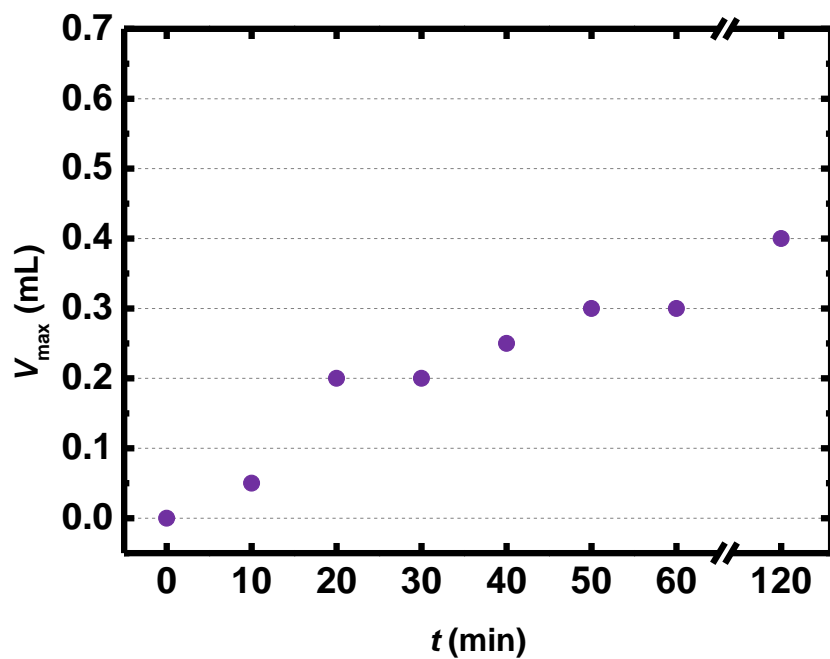

Figure S8. Swelling of a PDCPD aerogel thin disk in bromobenzene *versus* time.

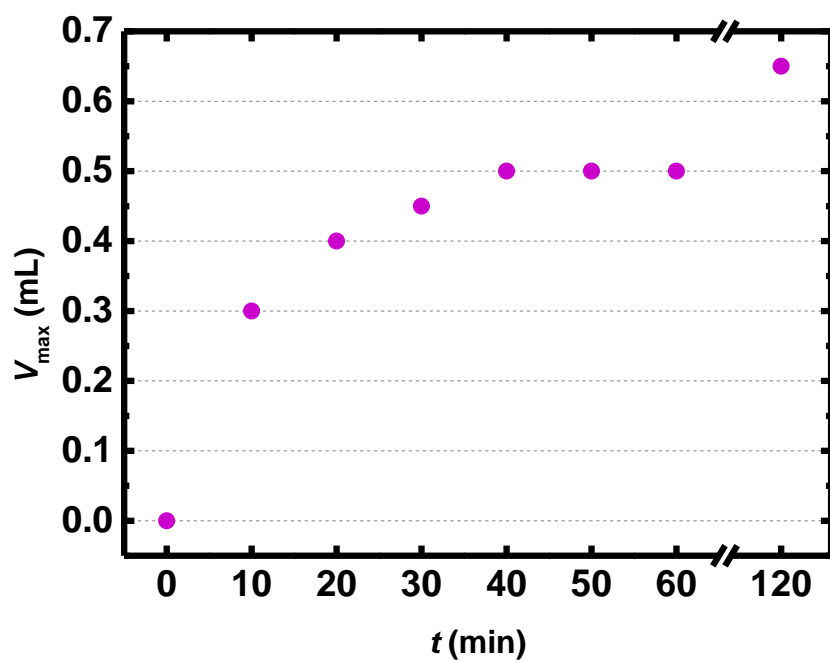

Figure S9. Swelling of a PDCPD aerogel thin disk in THF *versus* time.

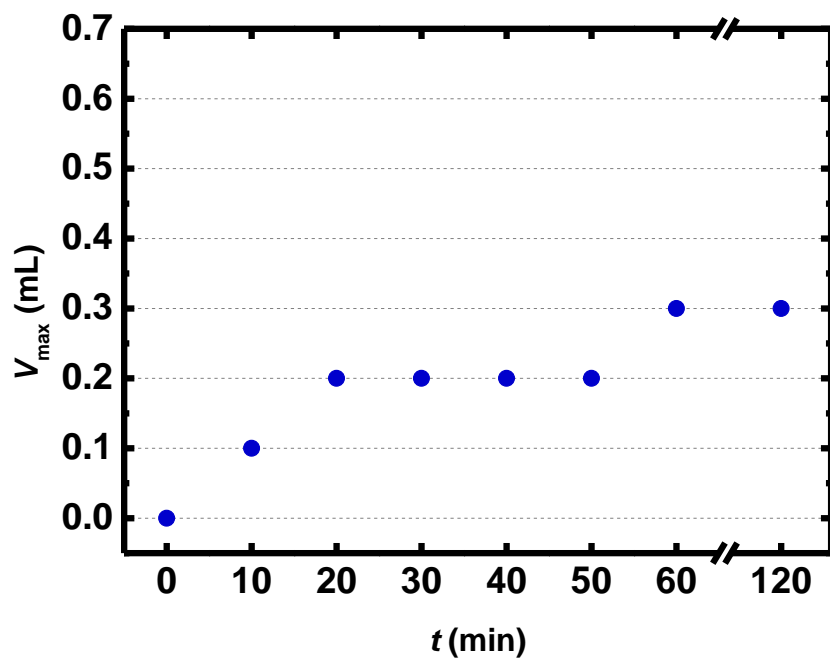

Figure S10. Swelling of a PDCPD aerogel thin disk in 1-bromobutane *versus* time.

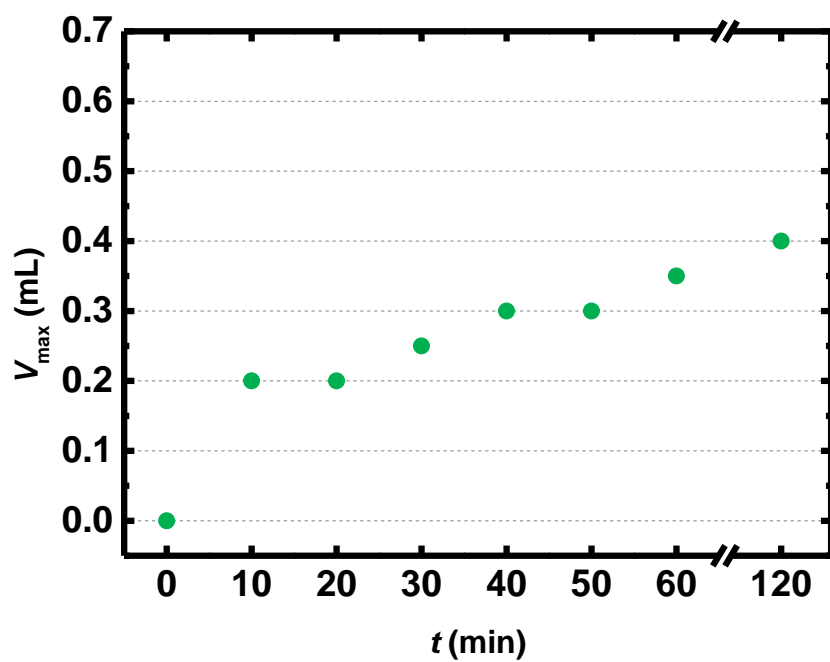

Figure S11. Swelling of a PDCPD aerogel thin disk in ethyl bromide *versus* time.



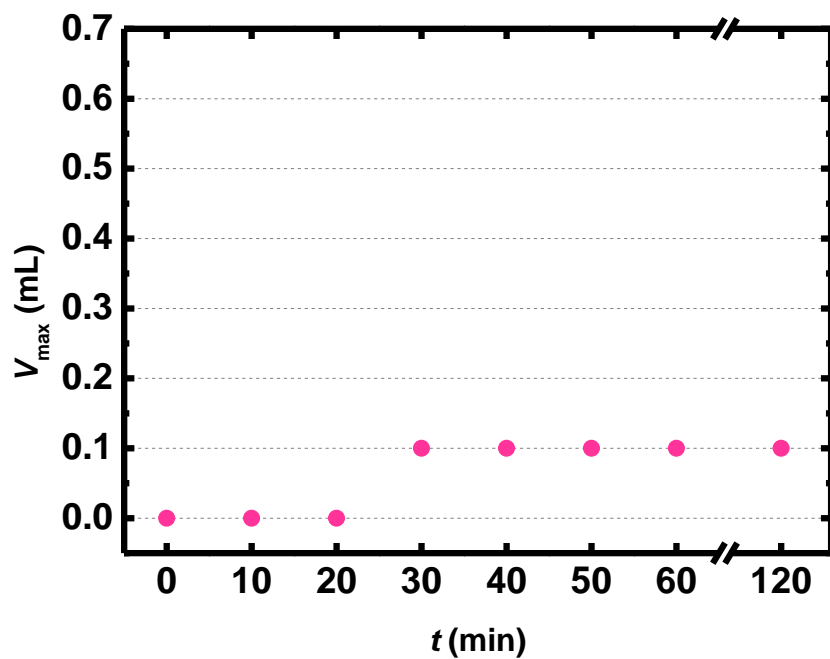

**Figure S12.** Swelling of a PDCPD aerogel thin disk in ethylene dichloride *versus* time.

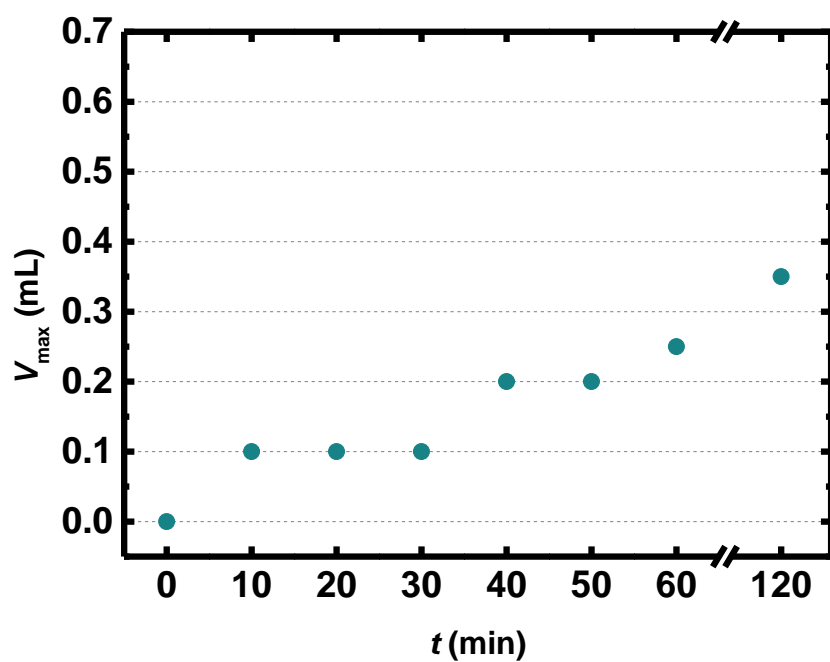

**Figure S13.** Swelling of a PDCPD aerogel thin disk in *m*-xylene *versus* time.

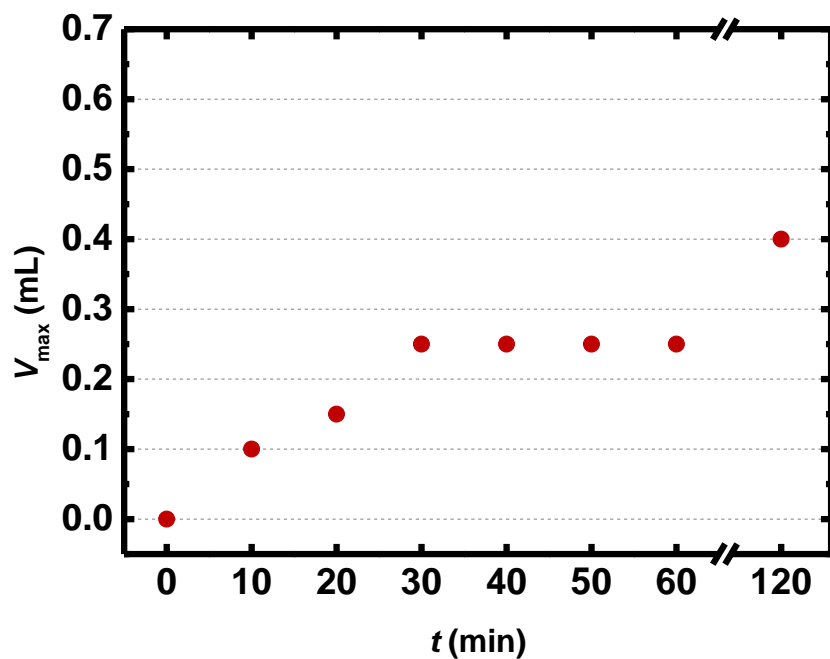

Figure S14. Swelling of a PDCPD aerogel thin disk in *p*-xylene *versus* time.

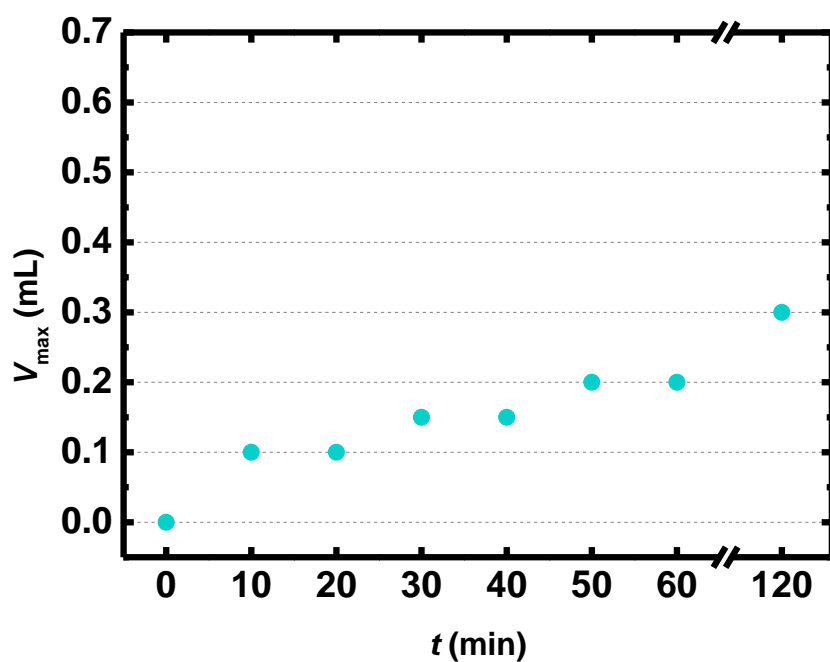

Figure S15. Swelling of a PDCPD aerogel thin disk in mesitylene *versus* time.
